# Supplementary material for: Guanine–copper coordination polymers: crystal analysis and application as thin film precursors
Source: Royal Society of Chemistry journal article supplement (doi:10.1039/c3dt52415a), 2013-10-31
Supplement: c3dt52415a.pdf [file c3dt52415a.pdf]

## **Supporting information**

# **Guanine-Copper coordination polymers: Crystal analysis and application as thin film precursors**

*N. Nagapradeep,<sup>a</sup> V. Venkatesh,<sup>a</sup> S. K. Tripathi,<sup>b</sup> Sandeep Verma<sup>\*a,c</sup>*

<sup>a</sup> Department of Chemistry, Indian Institute of Technology Kanpur, Kanpur-208016 (UP), India. <sup>b</sup> Defence Materials & Stores Research & Development Establishment (DMSRDE), DMSRDE PO, G. T. Road, Kanpur-208013 (UP), India. <sup>c</sup> DST Thematic Unit of Excellence on Soft Nanofabrication, Indian Institute of Technology Kanpur, Kanpur-208016 (UP), India.

E-mail: sverma@iitk.ac.in

**Table S1:** Selected hydrogen bonding distances (Å) and bond angles (°) in 1–3.

| D—H...A <sup>#</sup>                  | D...A     | H...A | D—H...A |
|---------------------------------------|-----------|-------|---------|
| <b>1</b>                              |           |       |         |
| N(1)—H(1)...Cl(2)                     | 3.145(3)  | 2.31  | 163     |
| N(2A)—H(2A1)...Cl(2) <sup>i</sup>     | 3.435(3)  | 2.66  | 150     |
| N(1A)—H(1A)...O(6A) <sup>ii</sup>     | 2.891(3)  | 2.05  | 166     |
| N(1B)—H(1B)...Cl(2) <sup>iii</sup>    | 3.408(3)  | 2.56  | 168     |
| N(2A)—H(2A2)...O(6B) <sup>ii</sup>    | 2.824(4)  | 2.04  | 151     |
| N(2)—H(2A)...Cl(3) <sup>iv</sup>      | 3.360(3)  | 2.52  | 165     |
| N(2)—H(2B)...O(1M) <sup>v</sup>       | 2.983(4)  | 2.20  | 151     |
| N(2)—H(2B1)...O(2M) <sup>iii</sup>    | 2.930(4)  | 2.11  | 160     |
| O(2M)—H2O2...O(6A) <sup>ii</sup>      | 2.859(4)  | 2.54  | 104     |
| O(1M)—H2O1...Cl(1) <sup>vi</sup>      | 3.160(3)  | 2.33  | 166     |
| C(8)—H(8)...Cl(1) <sup>vii</sup>      | 3.552(3)  | 2.63  | 174     |
| C(8A)—H(8A)...O(6)                    | 2.950(5)  | 2.42  | 116     |
| C(8A)—H(8A)...Cl(3) <sup>vii</sup>    | 3.573(4)  | 2.75  | 149     |
| C(8B)—H(8B)...Cl(3)                   | 3.656(4)  | 2.78  | 157     |
| C(8B)—H(8B)...O(6)                    | 2.972(4)  | 2.48  | 113     |
| C(11A)—H(11D)...Cl(3) <sup>i</sup>    | 3.627(8)  | 2.79  | 150     |
| C(11C)—H(11E)...O(1M) <sup>viii</sup> | 3.182(10) | 2.35  | 149     |
| C(11C)—H(11E)...N(9B)                 | 2.685(11) | 2.30  | 104     |
| <b>2</b>                              |           |       |         |
| N(1)—H(1)...Cl(2) <sup>ix</sup>       | 3.201(5)  | 2.38  | 160     |
| N(2)—H(2A)...Cl(1)                    | 3.403(6)  | 2.58  | 160     |
| N(2)—H(2B)...Cl(2) <sup>ix</sup>      | 3.423(6)  | 2.67  | 147     |
| C(8)—H(8)...Cl(1) <sup>x</sup>        | 3.494(6)  | 2.69  | 146     |
| C(9)—H(9B)...Cl(1) <sup>x</sup>       | 3.616(6)  | 2.71  | 156     |
| C(11)—H(11)...O(6) <sup>xi</sup>      | 3.172(7)  | 2.24  | 177     |
| <b>3</b>                              |           |       |         |
| N(1)—H(1)...Br(2) <sup>xii</sup>      | 3.313(8)  | 2.50  | 159     |
| N(2)—H(2A)...Br(1)                    | 3.470(8)  | 2.64  | 161     |
| N(2)—H(2B)...Br(2) <sup>xii</sup>     | 3.473(8)  | 2.70  | 150     |
| C(8)—H(8)...Br(1) <sup>xiii</sup>     | 3.601(9)  | 2.79  | 146     |
| C(9)—H(9A)...Br(1) <sup>xiii</sup>    | 3.687(9)  | 2.77  | 158     |
| C(11)—H(11)...O(6) <sup>xiv</sup>     | 3.212(11) | 2.28  | 175     |

<sup>#</sup>Symmetry of A: (i) -1+x,y,z (ii) 1-x,1-y,1-z (iii) 2-x,1-y,1-z (iv) x,-1+y,z (v) 1+x,y,z (vi) -1+x,-1+y,z (vii) 2-x,2-y,-z (viii) 1+x,1+y,z (ix) 1-x,-y,1-z (x) -1+x,1/2-y,-1/2+z (xi) 1-x,1/2+y,3/2-z (xii) 1+x,y,z (xiii) -1+x,1/2-y,-1/2+z (xiv) 1-x,1/2+y,1/2-z; where A= acceptor and D= donor

**Table S2:** Observed bond lengths (Å) between constituent atoms.

| Bond    | N9-<br>propargyl<br>Guanine <sup>4i</sup> | <b>2</b> | <b>3</b> |
|---------|-------------------------------------------|----------|----------|
| C2-N1   | 1.369                                     | 1.361    | 1.364    |
| C2-N2   | 1.335                                     | 1.337    | 1.332    |
| C2-N3   | 1.319                                     | 1.332    | 1.326    |
| C4-C5   | 1.387                                     | 1.366    | 1.366    |
| C4-N9   | 1.362                                     | 1.371    | 1.363    |
| C4-N3   | 1.351                                     | 1.356    | 1.367    |
| C5-N7   | 1.390                                     | 1.384    | 1.391    |
| C5-C6   | 1.408                                     | 1.417    | 1.421    |
| C6-O6   | 1.241                                     | 1.226    | 1.228    |
| C6-N1   | 1.393                                     | 1.403    | 1.401    |
| C8-N7   | 1.304                                     | 1.321    | 1.308    |
| C8-N9   | 1.380                                     | 1.375    | 1.376    |
| C9-N9   | 1.467                                     | 1.473    | 1.482    |
| C9-C10  | 1.456                                     | 1.484    | 1.470    |
| C10-C11 | 1.183                                     | 1.213    | 1.214    |
| Cu1-C10 | -----                                     | 2.053    | 2.066    |
| Cu1-C11 | -----                                     | 2.077    | 2.072    |
| Cu1-N3  | -----                                     | 2.052    | 2.051    |
| Cu2-N7  | -----                                     | 1.952    | 1.954    |

**Figure S1:** (a) Crystal lattice of **3** when viewed along *a*-axis. (b) Corresponding bond lengths and distances (Å) in **3**.

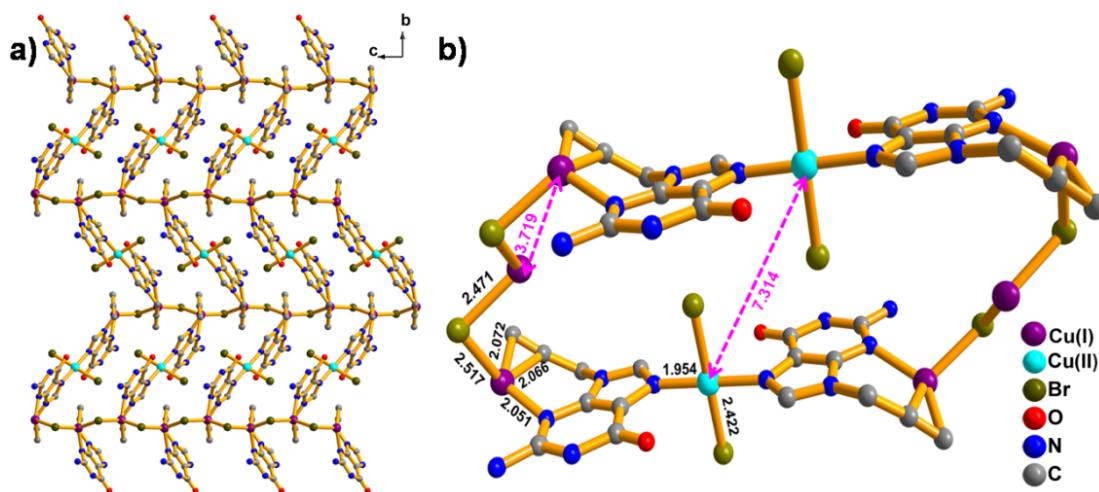

**Figure S2:** SEM images of thin films from **1–3** ( $T_1 = 450\text{ }^\circ\text{C}$ ; a, c, e), ( $T_2 = 600\text{ }^\circ\text{C}$ ; b, d, f).

Scale: 1  $\mu\text{m}$ .

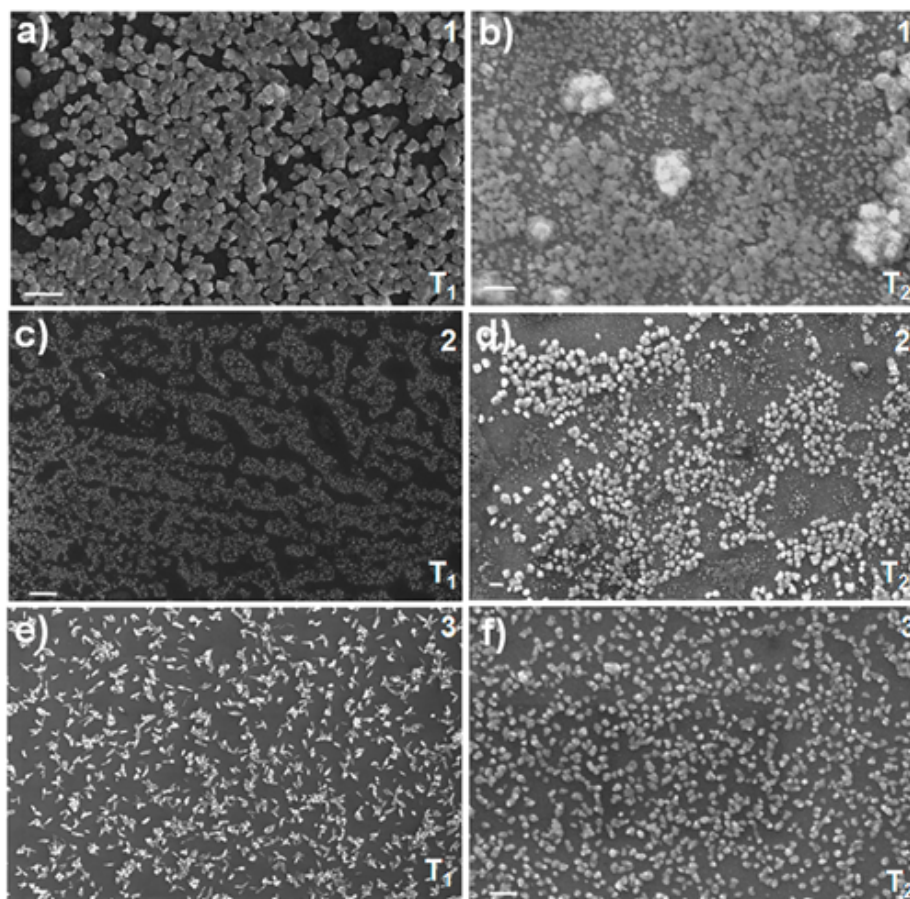

**Figure S3:** SEM images of thin films from  $\text{CuCl}_2$ ,  $\text{CuBr}_2$  on Si(100) ( $T_1 = 450\text{ }^\circ\text{C}$ ; a, c), ( $T_2 = 600\text{ }^\circ\text{C}$ ; b, d). scale:  $2\text{ }\mu\text{m}$ .

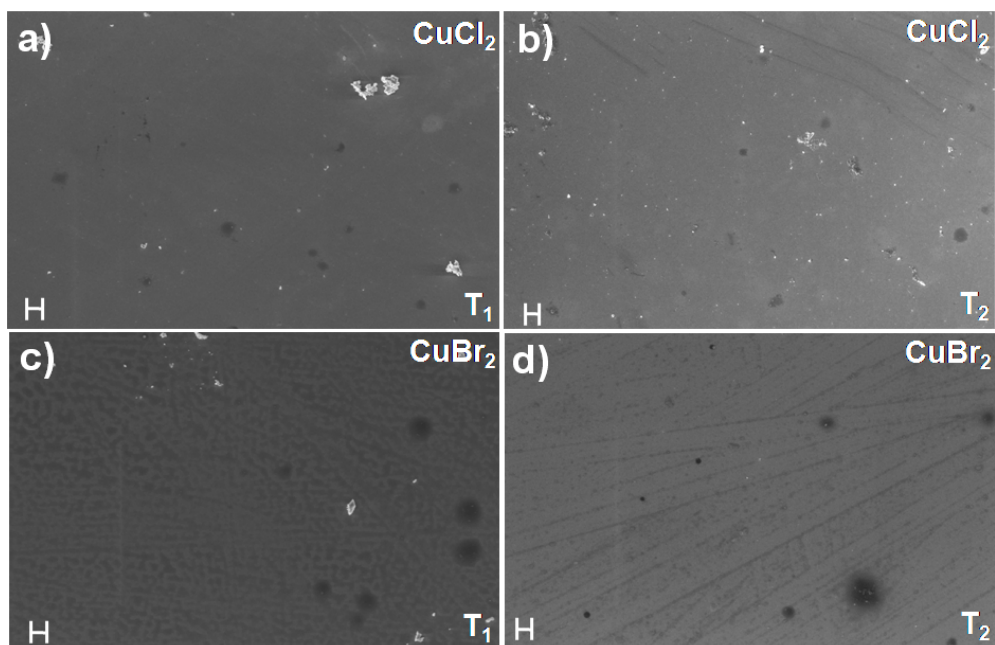

**Figure S4:** AFM images of thin film from **1**. (a) AFM image at  $T_1$  [ $1.9 \times 1.9\text{ }\mu\text{m}$ ]. (b) AFM image at  $T_2$  [ $5 \times 5\text{ }\mu\text{m}$ ]. (c & e) 3D image and diameter-height profile of panel [a] respectively. (d & f) 3D image and diameter-height profile of panel [b] respectively.

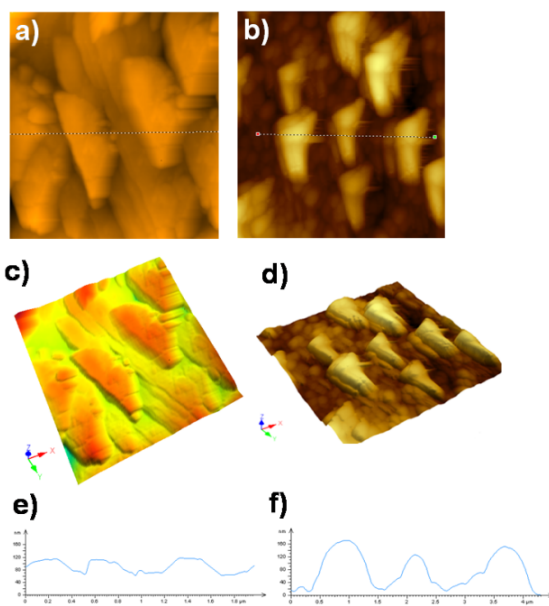

**Figure S5:** AFM images of thin film from **2**. (a) AFM image at  $T_1$  [ $1.9 \times 1.9 \mu\text{m}$ ]. (b) AFM image at  $T_2$  [ $1.3 \times 1.3 \mu\text{m}$ ]. (c & e) 3D image and diameter-height profile of panel [a] respectively. (d & f) 3D image and diameter-height profile of panel [b] respectively.

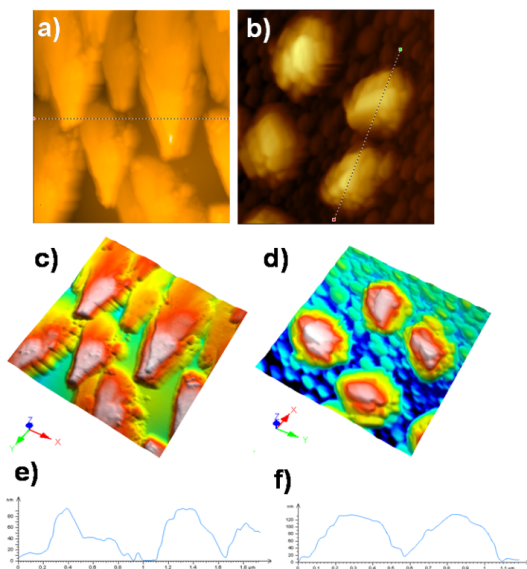

**Figure S6:** AFM images of thin film from **3**. (a) AFM image at  $T_1$  [ $2.1 \times 2.1 \mu\text{m}$ ]. (b) AFM image at  $T_2$  [ $0.9 \times 1.3 \mu\text{m}$ ]. (c & e) 3D image and diameter-height profile of panel [a] respectively. (d & f) 3D image and diameter-height profile of panel [b] respectively.

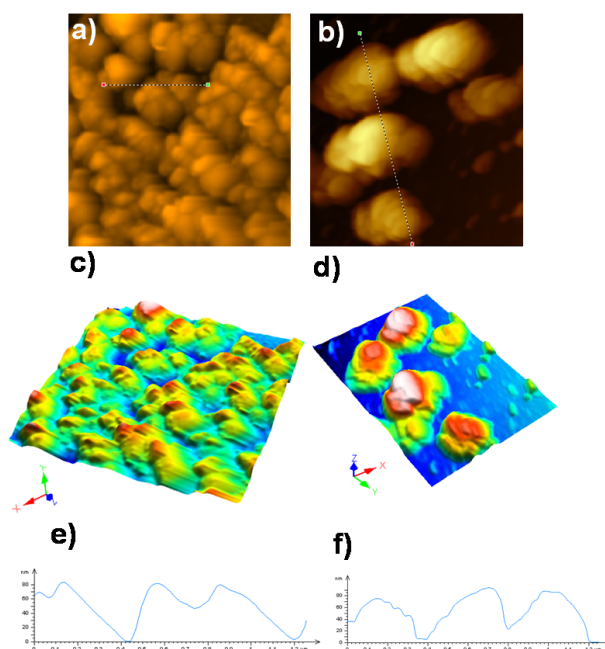

Figure S7: IR spectrum of N9-propargylguanine.

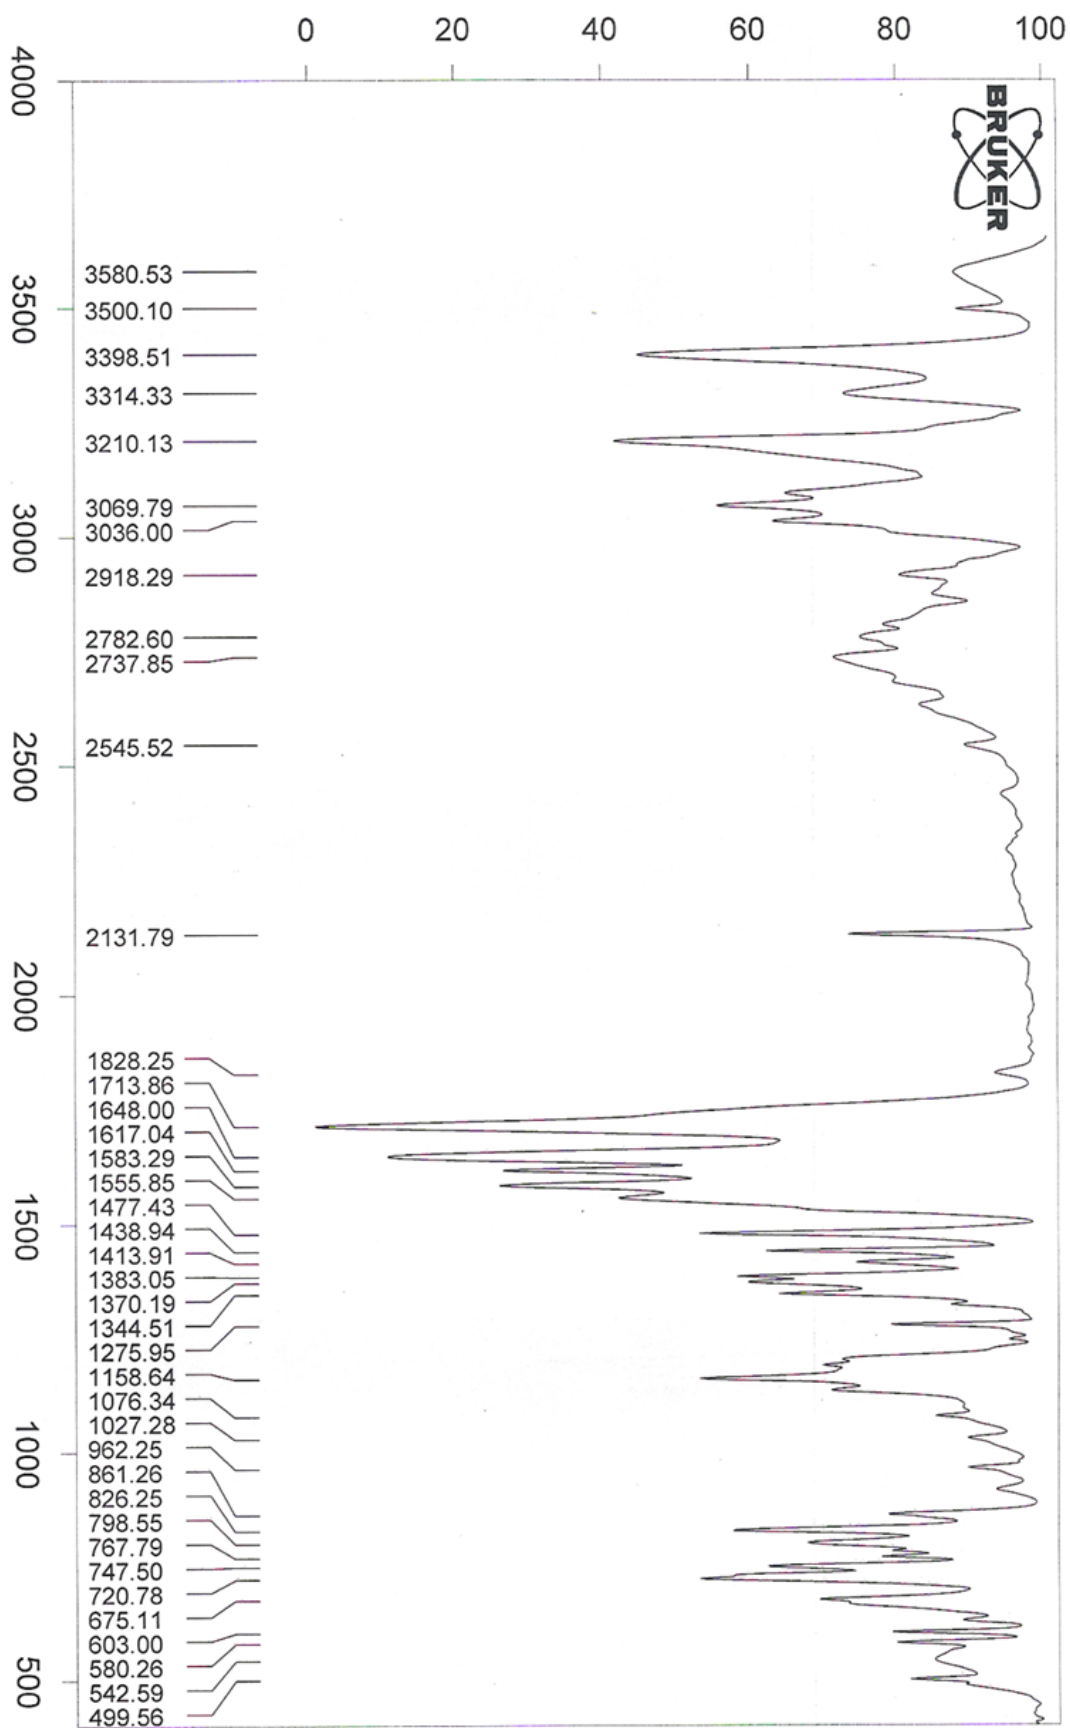



Figure S8: IR spectrum of 2.

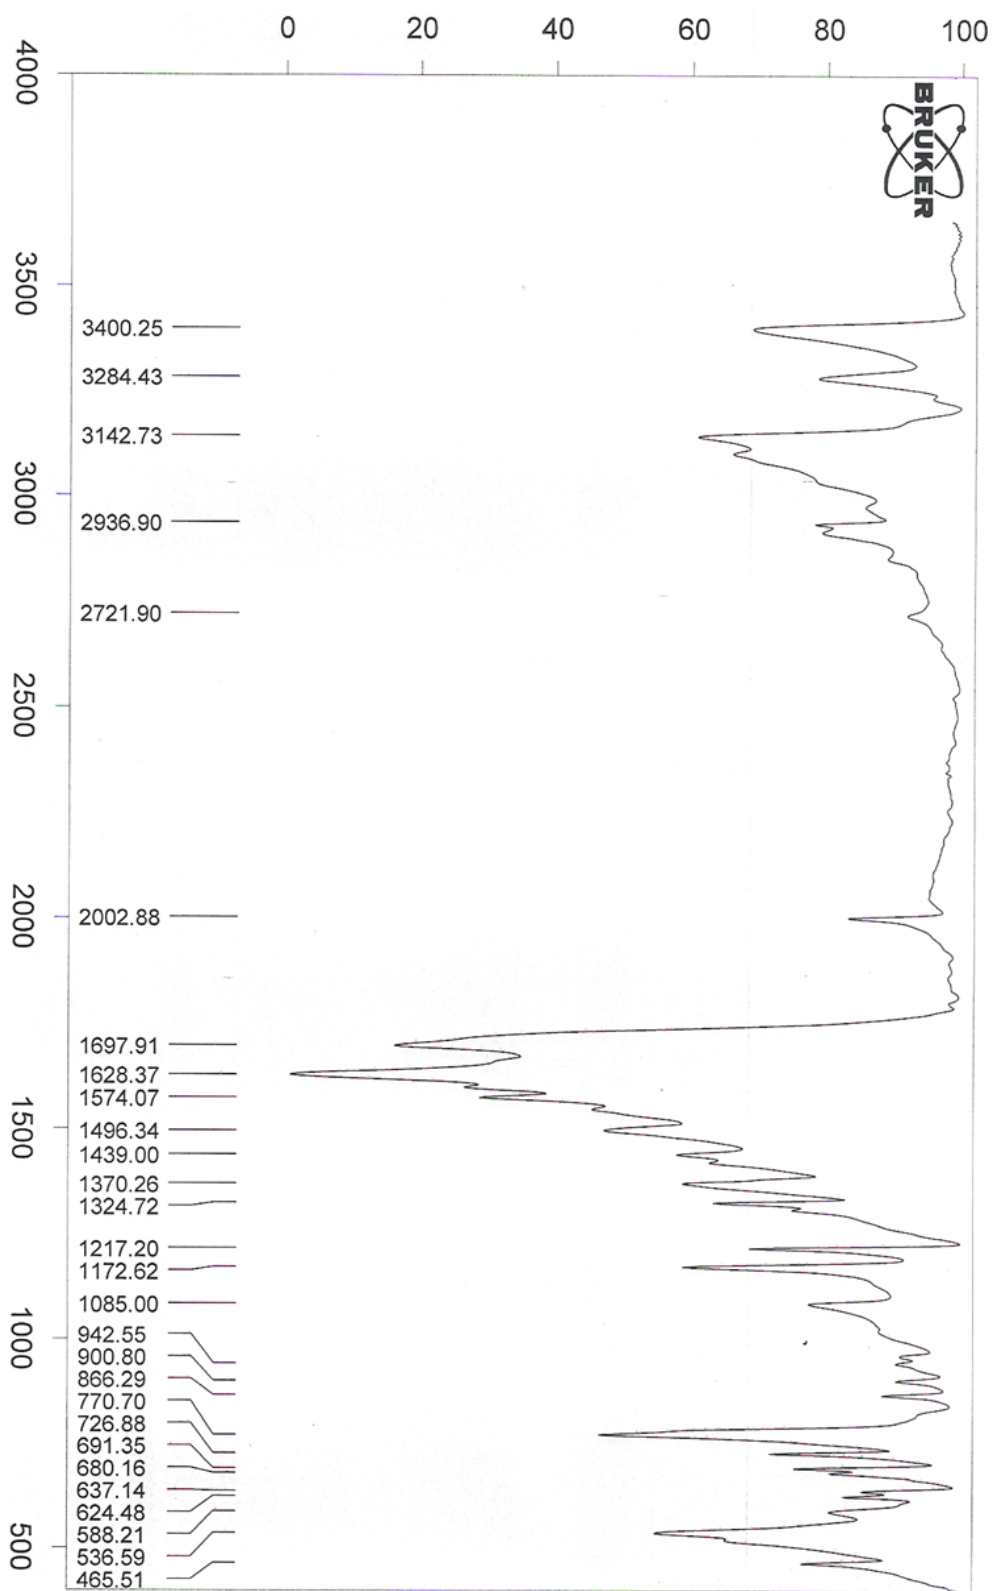



Figure S9: IR spectrum of 3.

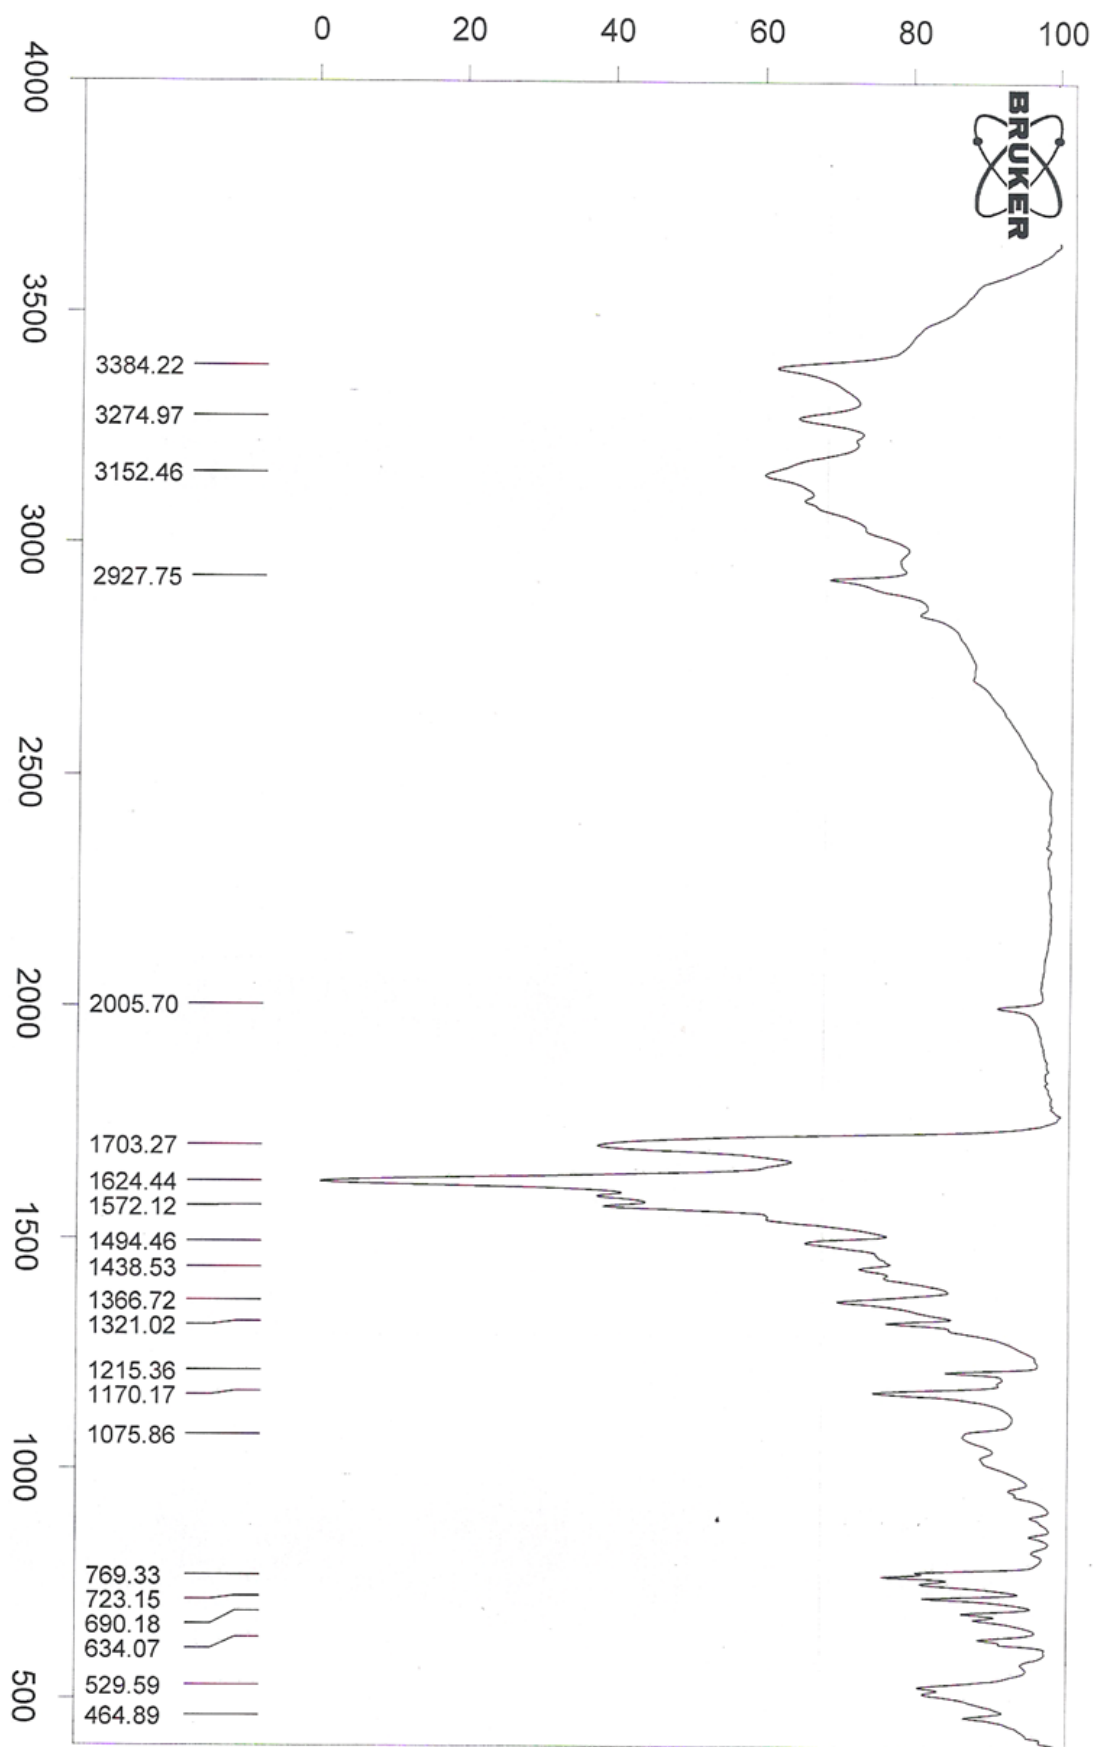

Figure S10: ESI-HRMS of 1.

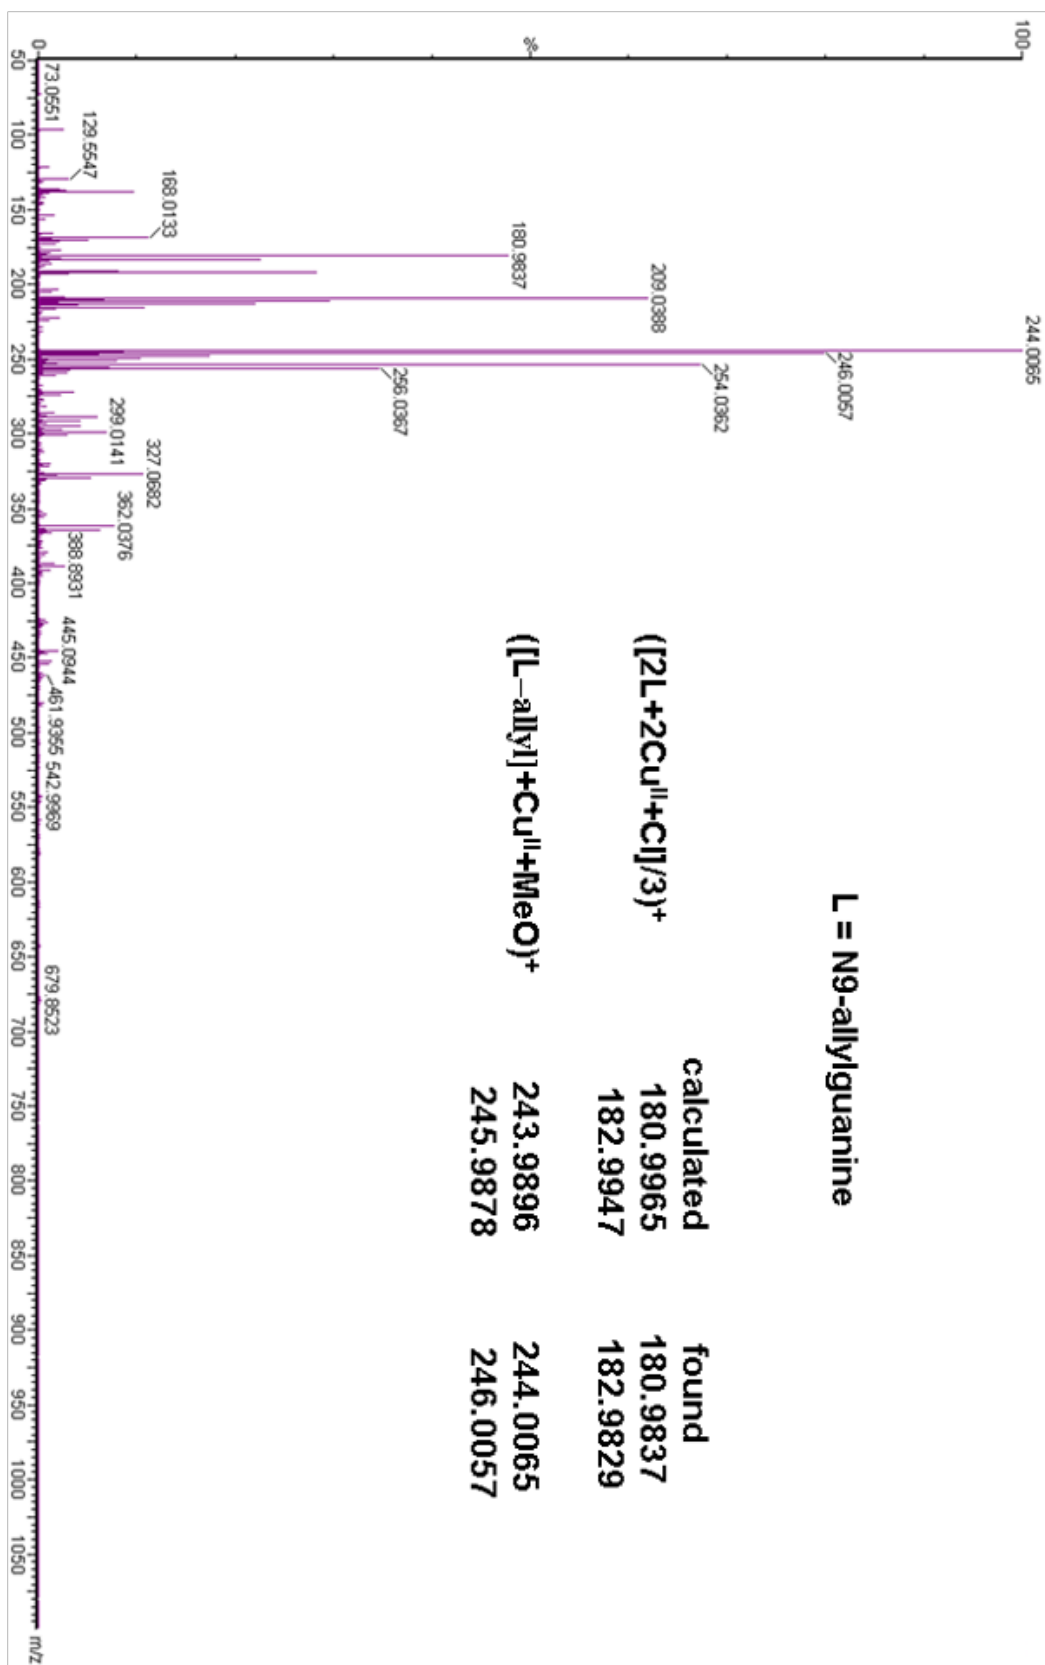

Figure S11: ESI-HRMS of 2.

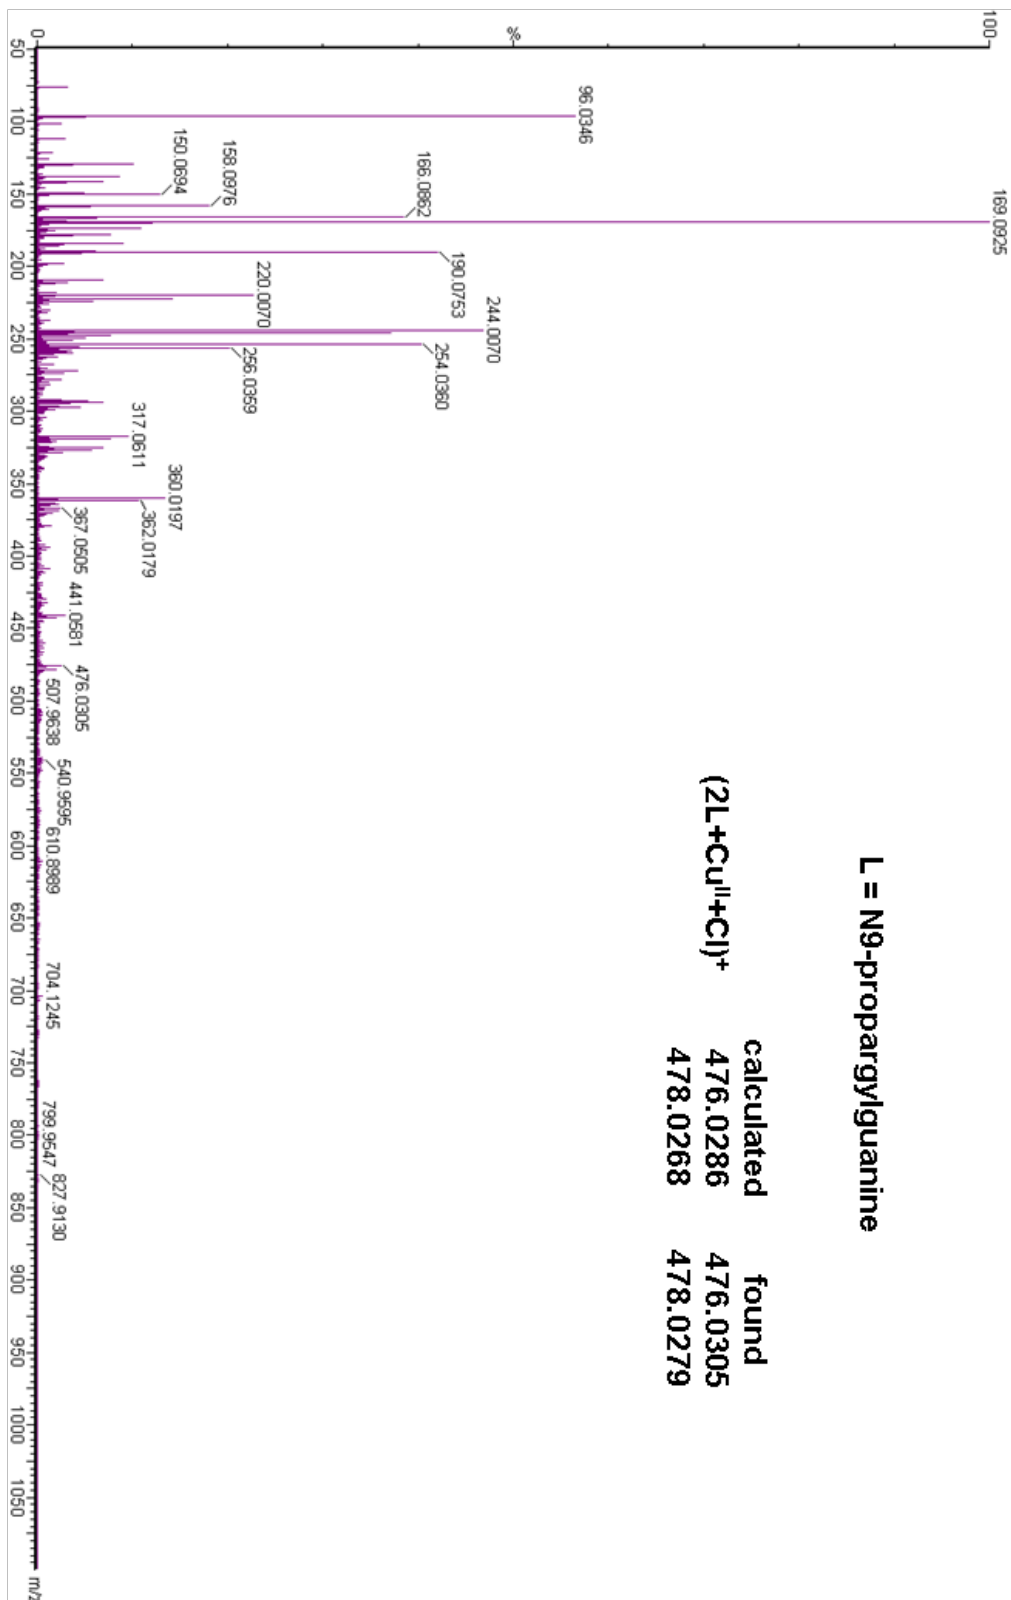

Figure S12: ESI-HRMS of 3.

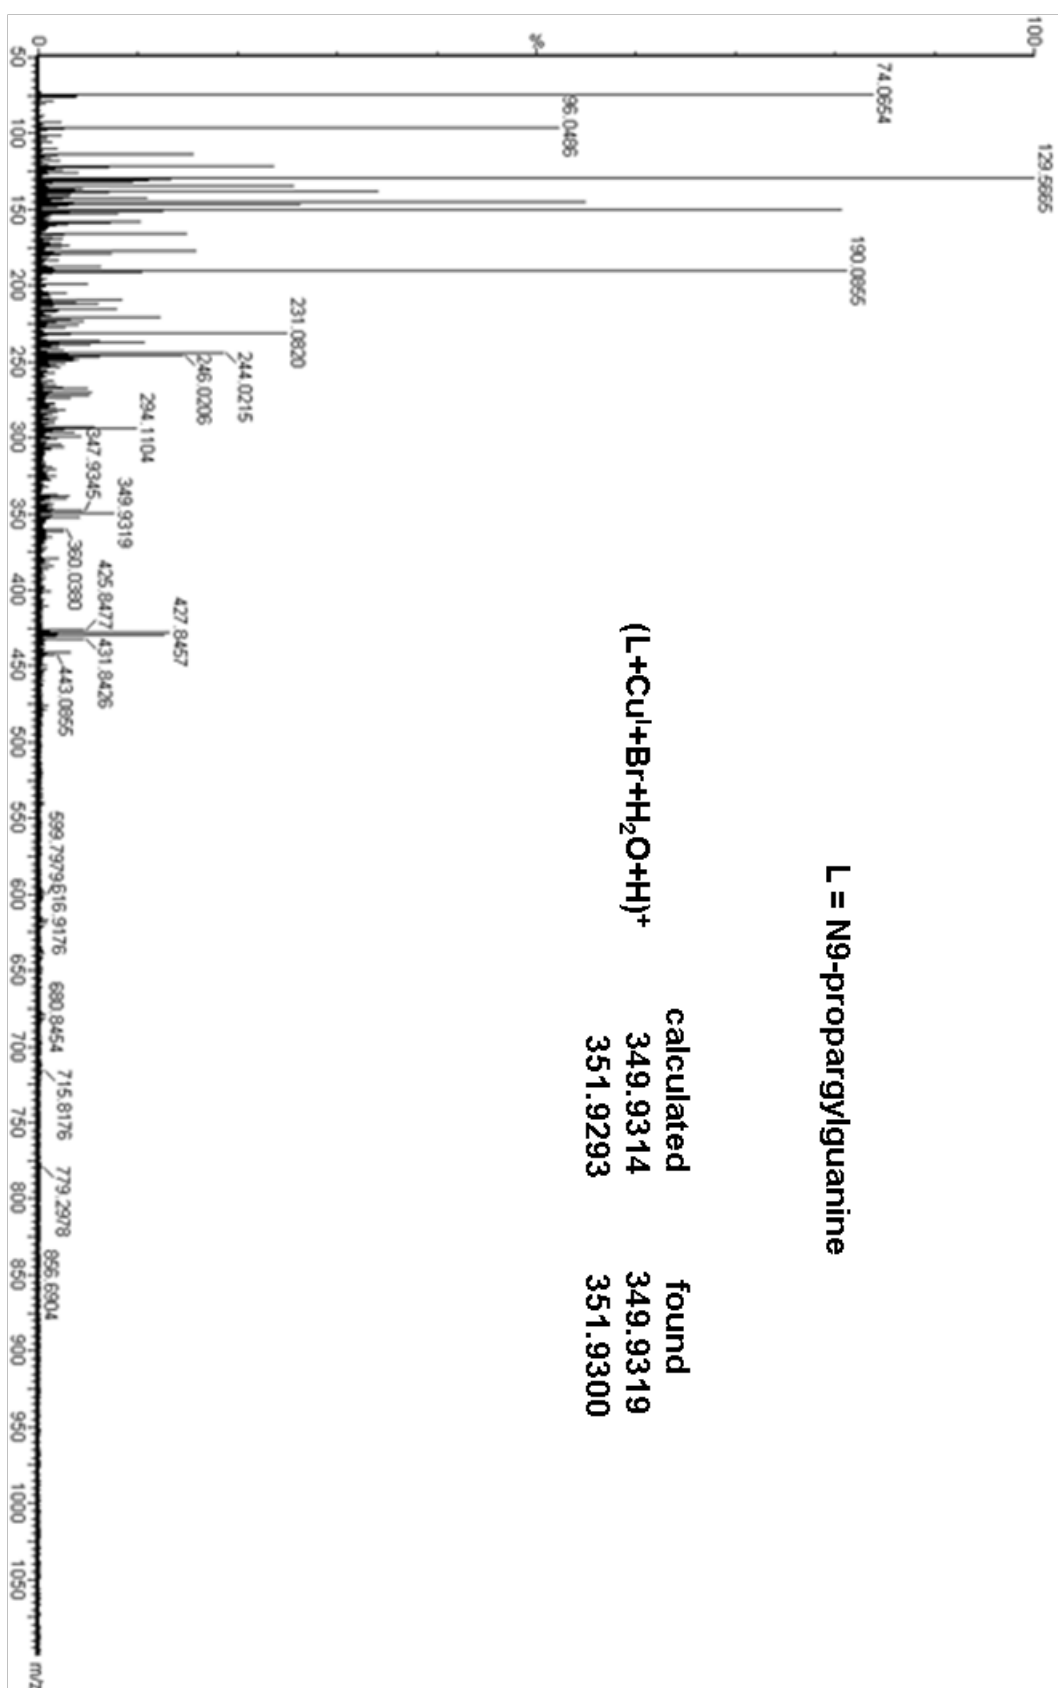

**Figure S13:** PXRD spectra of complexes.

(i) PXRD pattern of **1**. (a) simulated pattern at 100 K (b) observed pattern at 298 K

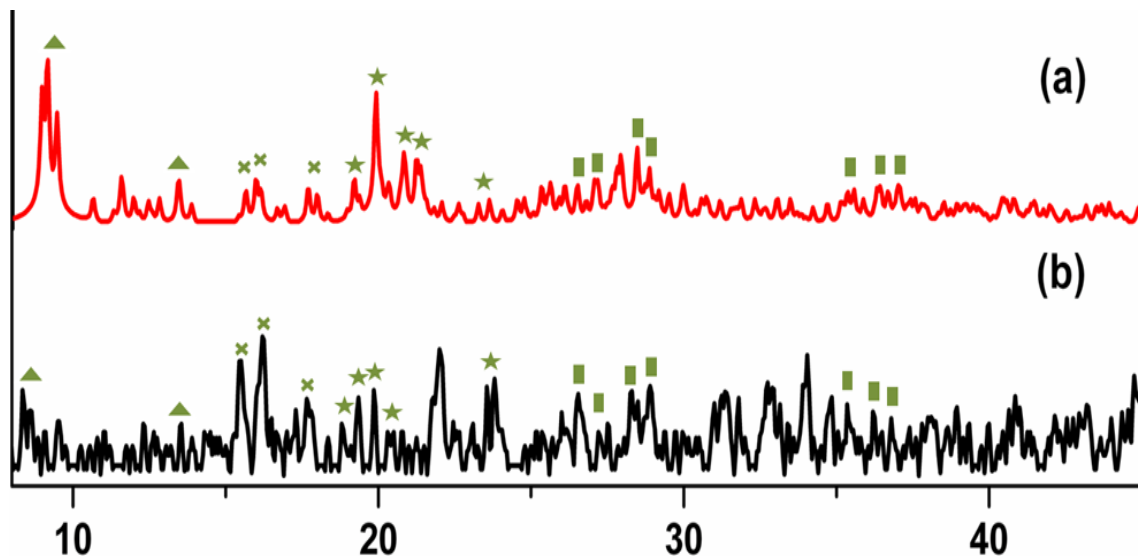

(ii) PXRD pattern of **2**. (a) simulated pattern at 100 K (b) observed pattern at 298 K

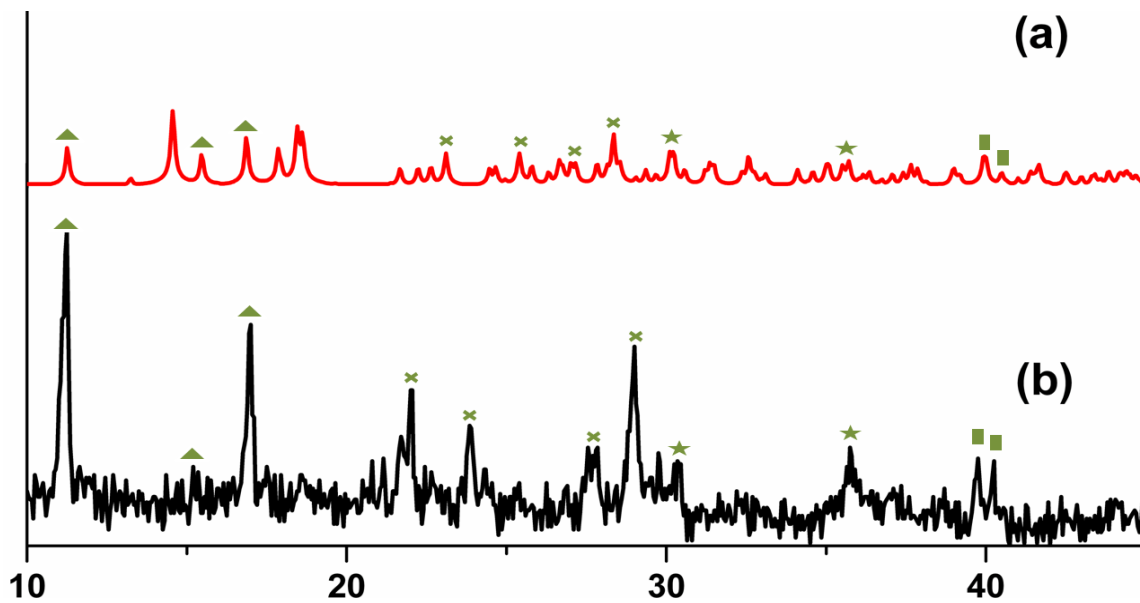

(iii) PXRD pattern of **3**. (a) simulated pattern at 100 K (b) observed pattern at 298 K

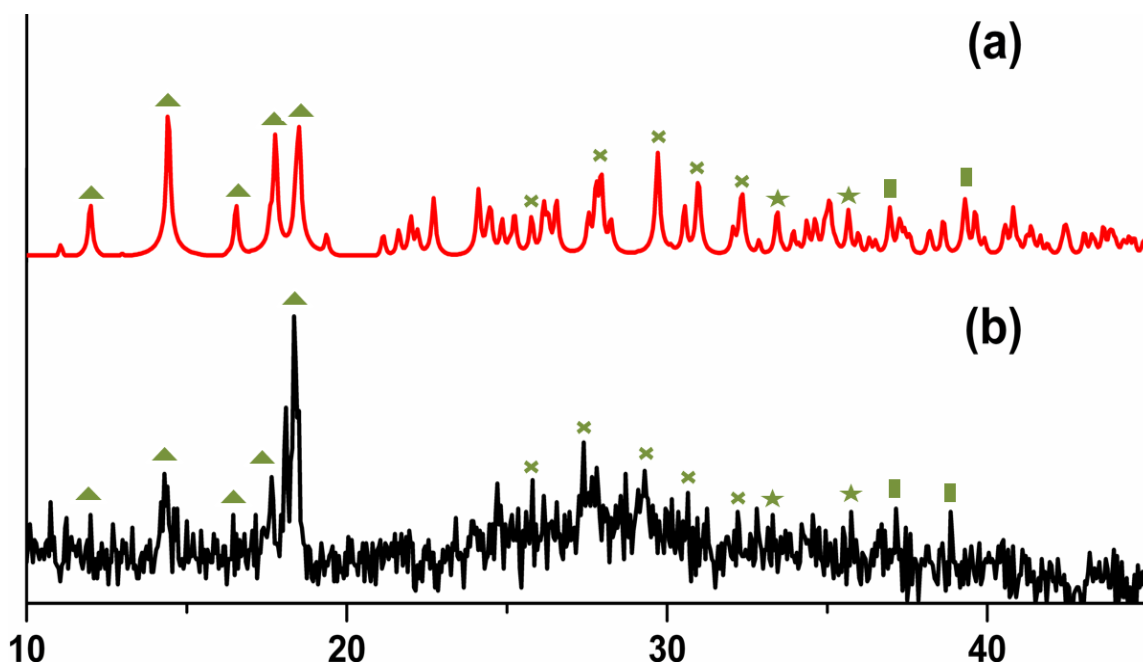

The peak correspondence is marked with symbols. The reason for some of peaks are shifted may be attributed to difference in temperature for simulated and observed PXRD data, which causes a difference in the inter-planar distances, thus changing the  $\theta$  values.
